# Supplementary material
Source: PubMed Central journal article supplement (PMC17683)
Supplement: pnas_97_25_13961__3.pdf [file pnas_97_25_13961__3.pdf]

Table 4.

Verb - Imitation

| ASL |     |     |     |      | LSQ |     |     |     |      | Hearing 1 |     |     |     |      | Hearing 2 |     |     |     |      |
|-----|-----|-----|-----|------|-----|-----|-----|-----|------|-----------|-----|-----|-----|------|-----------|-----|-----|-----|------|
| #   | x   | y   | z   | t    | #   | x   | y   | z   | t    | #         | x   | y   | z   | t    | #         | x   | y   | z   | t    |
| 1   | -46 | 32  | 2   | 5.15 | 1   | -34 | 24  | -9  | 6.55 | 1         | 0   | 41  | -17 | 6.86 | 1         | -59 | -26 | -2  | 6.62 |
| 2   | -55 | -47 | -17 | 5.10 | 2   | -47 | 25  | 21  | 5.17 | 2         | -47 | 27  | 0   | 6.56 | 2         | -35 | 29  | -3  | 6.28 |
| 3   | 35  | 27  | -2  | 4.98 | 3   | -55 | -31 | 0   | 4.63 | 3         | -5  | 34  | 51  | 6.44 | 3         | -3  | 42  | 29  | 6.23 |
| 4   | -46 | 20  | 30  | 4.55 | 4   | -29 | 56  | -2  | 4.33 | 4         | 16  | 56  | -2  | 6.16 | 4         | -27 | -93 | -2  | 6.18 |
| 5   | -31 | 22  | 3   | 4.38 | 5   | -9  | 27  | 38  | 4.32 | 5         | -38 | 32  | -11 | 6.14 | 5         | -9  | 56  | 35  | 6.15 |
| 6   | -4  | 34  | 42  | 3.97 | 6   | -59 | -44 | -15 | 4.29 | 6         | -8  | 63  | 14  | 5.72 | 6         | -3  | 44  | 50  | 5.66 |
| 7   | 27  | 58  | -3  | 3.86 | 7   | 32  | 22  | -11 | 4.25 | 7         | -5  | 30  | 35  | 5.56 | 7         | -11 | 39  | 56  | 5.46 |
| 8   | -35 | -68 | -20 | 3.69 | 8   | -12 | 27  | -21 | 4.17 | 8         | -59 | -42 | -6  | 5.46 | 8         | -1  | 46  | 6   | 5.25 |
| 9   | 8   | 32  | 32  | 3.66 | 9   | -17 | -83 | -23 | 3.92 | 9         | -51 | 8   | -17 | 5.38 | 9         | 21  | 37  | 53  | 5.24 |
| 10  | 9   | -81 | -18 | 3.61 | 10  | 7   | 37  | -17 | 3.74 | 10        | -20 | -95 | -8  | 5.37 | 10        | -5  | 22  | -17 | 5.02 |
| 11  | -32 | 55  | 9   | 3.52 | 11  | -34 | -64 | 45  | 3.52 | 11        | 28  | -93 | 0   | 5.26 | 11        | -54 | -64 | 36  | 4.98 |
| 12  | 52  | 20  | 12  | 3.46 | 12  | -1  | -97 | 45  | 3.43 | 12        | -27 | 48  | -5  | 4.97 | 12        | -29 | 29  | 54  | 4.84 |
| 13  | 20  | 1   | 24  | 3.30 | 13  | -13 | 12  | 6   | 3.39 | 13        | -55 | -26 | 5   | 4.97 | 13        | 15  | 58  | -14 | 4.76 |
| 14  | -11 | 22  | -14 | 3.16 | 14  | 1   | 36  | 23  | 3.36 | 14        | -5  | 42  | 14  | 4.66 | 14        | 24  | -97 | -2  | 4.74 |
| 15  | 42  | -59 | -21 | 3.09 | 15  | 51  | 22  | 35  | 3.34 | 15        | -25 | 17  | -20 | 4.56 | 15        | -25 | 61  | 12  | 4.52 |
| 16  | 20  | 22  | -20 | 3.05 | 16  | 52  | -52 | -18 | 3.34 | 16        | -56 | -13 | -6  | 4.41 | 16        | 13  | 29  | -14 | 4.49 |
| 17  | -66 | -49 | -2  | 3.00 | 17  | 43  | 36  | -9  | 3.34 | 17        | 19  | 34  | -12 | 4.39 | 17        | 12  | 20  | -14 | 4.48 |
| 18  | 62  | -64 | 47  | 2.98 | 18  | -4  | 12  | 63  | 3.31 | 18        | -52 | -16 | -20 | 4.36 | 18        | 64  | -23 | 3   | 4.46 |
| 19  | -25 | 49  | -11 | 2.94 | 19  | 27  | -64 | -24 | 3.20 | 19        | -48 | 15  | 38  | 4.34 | 19        | 9   | 10  | 9   | 4.38 |
| 20  | -50 | -52 | 53  | 2.91 | 20  | 44  | -68 | -21 | 3.19 | 20        | -27 | 20  | 62  | 4.33 | 20        | -12 | 58  | -14 | 4.38 |
| 21  | 21  | -52 | 6   | 2.82 | 21  | 15  | 22  | -15 | 3.12 | 21        | 11  | -4  | -21 | 4.28 | 21        | 60  | -31 | 0   | 4.31 |
| 22  | -46 | -83 | 8   | 2.75 | 22  | 67  | -42 | -5  | 3.09 | 22        | 36  | 18  | -9  | 4.16 | 22        | -40 | 3   | -20 | 4.25 |
| 23  | -44 | -83 | 8   | 2.75 | 23  | -35 | -4  | 42  | 3.06 | 23        | 1   | -9  | 12  | 4.08 | 23        | 29  | 53  | 3   | 4.19 |
| 24  | -29 | 15  | 50  | 2.75 | 24  | 3   | 32  | 51  | 3.00 | 24        | 39  | 36  | -6  | 4.05 | 24        | -56 | -7  | -21 | 3.98 |
| 25  | -32 | -71 | -5  | 2.71 | 25  | 66  | -31 | 60  | 2.98 | 25        | 55  | -28 | 6   | 4.04 | 25        | 36  | 15  | -17 | 3.85 |
| 26  | 12  | -88 | 11  | 2.67 | 26  | 36  | -74 | 60  | 2.96 | 26        | 60  | -23 | 2   | 3.94 | 26        | -50 | -56 | 50  | 3.84 |
| 27  | 19  | -83 | 3   | 2.61 | 27  | -4  | -80 | -23 | 2.96 | 27        | 13  | 51  | 42  | 3.87 | 27        | -54 | 13  | -21 | 3.81 |
| 28  | 21  | 53  | 27  | 2.61 | 28  | 40  | 60  | 2   | 2.91 | 28        | 25  | 6   | 26  | 3.73 | 28        | 12  | -87 | -23 | 3.79 |
| 29  | -8  | -2  | -8  | 2.51 | 29  | -24 | 1   | -6  | 2.89 | 29        | 43  | 17  | 8   | 3.69 | 29        | -50 | 5   | -23 | 3.71 |
| 30  | -20 | -59 | 47  | 2.51 | 30  | 3   | -28 | -11 | 2.88 | 30        | 51  | 1   | -12 | 3.64 | 30        | -54 | -4  | 26  | 3.63 |
|     |     |     |     |      | 31  | 54  | 42  | 9   | 2.88 | 31        | 27  | 55  | 33  | 3.57 | 31        | 0   | 37  | -17 | 3.59 |
|     |     |     |     |      | 32  | 19  | 61  | 9   | 2.84 | 32        | -24 | 17  | 20  | 3.52 | 32        | 46  | -35 | 0   | 3.58 |
|     |     |     |     |      | 33  | 46  | -92 | -2  | 2.70 | 33        | -38 | -18 | -14 | 3.42 | 33        | -34 | -18 | -18 | 3.58 |
|     |     |     |     |      | 34  | -43 | -47 | 17  | 2.67 | 34        | 51  | -16 | -15 | 3.39 | 34        | 1   | -47 | 30  | 3.55 |
|     |     |     |     |      | 35  | 28  | -95 | -15 | 2.66 | 35        | 1   | -49 | 30  | 3.34 | 35        | 3   | -11 | -11 | 3.50 |
|     |     |     |     |      | 36  | 58  | 17  | 53  | 2.64 | 36        | -21 | -9  | 29  | 3.18 | 36        | 40  | 15  | 62  | 3.48 |
|     |     |     |     |      | 37  | 24  | -88 | -23 | 2.62 | 37        | 51  | 8   | 62  | 3.12 | 37        | -24 | 48  | 45  | 3.43 |
|     |     |     |     |      | 38  | 20  | 36  | -8  | 2.58 | 38        | -8  | -1  | 0   | 3.07 | 38        | -39 | 22  | 44  | 3.38 |
|     |     |     |     |      | 39  | 13  | 15  | 3   | 2.54 | 39        | -29 | -44 | 15  | 3.01 | 39        | -3  | 3   | -6  | 3.37 |
|     |     |     |     |      |     |     |     |     |      | 40        | -28 | -13 | -20 | 3.01 | 40        | -7  | -47 | 38  | 3.33 |
|     |     |     |     |      |     |     |     |     |      | 41        | -24 | -35 | 18  | 2.91 | 41        | -13 | 12  | 2   | 3.31 |
|     |     |     |     |      |     |     |     |     |      | 42        | 15  | 60  | 26  | 2.79 | 42        | 56  | -13 | -8  | 3.27 |
|     |     |     |     |      |     |     |     |     |      | 43        | -43 | -62 | 42  | 2.72 | 43        | -4  | -4  | -21 | 3.14 |
|     |     |     |     |      |     |     |     |     |      | 44        | 64  | -66 | 47  | 2.71 | 44        | 3   | -21 | 12  | 3.07 |
|     |     |     |     |      |     |     |     |     |      | 45        | -31 | -54 | 29  | 2.64 | 45        | 34  | -78 | -24 | 3.04 |
|     |     |     |     |      |     |     |     |     |      | 46        | 19  | 25  | 60  | 2.58 | 46        | 62  | -7  | 12  | 2.99 |
|     |     |     |     |      |     |     |     |     |      | 47        | 51  | -9  | 32  | 2.57 | 47        | -13 | 6   | 15  | 2.88 |
|     |     |     |     |      |     |     |     |     |      | 48        | 11  | 36  | 29  | 2.53 | 48        | 48  | 20  | -2  | 2.59 |
|     |     |     |     |      |     |     |     |     |      | 49        | 23  | -95 | 62  | 2.50 | 49        | 56  | 6   | -15 | 2.56 |
|     |     |     |     |      |     |     |     |     |      | 50        | -46 | -95 | 48  | 2.51 | 50        | -46 | -95 | 48  | 2.51 |
