# Supplementary material
Source: PubMed Central journal article supplement (PMC17683)
Supplement: pnas_97_25_13961__4.pdf [file pnas_97_25_13961__4.pdf]

Table 5.

Verb - View signs

| ASL |     |     |     |      | LSQ |     |      |     |      | Hearing 1 |     |     |     |      | Hearing 2 |     |     |     |      |
|-----|-----|-----|-----|------|-----|-----|------|-----|------|-----------|-----|-----|-----|------|-----------|-----|-----|-----|------|
| #   | x   | y   | z   | t    | #   | x   | y    | z   | t    | #         | x   | y   | z   | t    | #         | x   | y   | z   | t    |
| 1   | -8  | -71 | 12  | 4.64 | 1   | 5   | -62  | -15 | 6.51 | 1         | -1  | 17  | 47  | 7.54 | 1         | -4  | 18  | 48  | 5.67 |
| 2   | -35 | 18  | 8   | 4.53 | 2   | -46 | 20   | 14  | 5.93 | 2         | -46 | 20  | 5   | 7.08 | 2         | -52 | -1  | 30  | 5.55 |
| 3   | -12 | -74 | 41  | 4.44 | 3   | -15 | -74  | 47  | 5.31 | 3         | 39  | 13  | 3   | 4.98 | 3         | -9  | 10  | 65  | 5.32 |
| 4   | 4   | 30  | 29  | 4.35 | 4   | -25 | -2   | 65  | 4.83 | 4         | -44 | 8   | 27  | 4.84 | 4         | -34 | -92 | -2  | 4.67 |
| 5   | -47 | -54 | -21 | 3.86 | 5   | -3  | 8    | 65  | 4.66 | 5         | 27  | -93 | 0   | 4.65 | 5         | -42 | 25  | 3   | 4.61 |
| 6   | 0   | -61 | -18 | 3.83 | 6   | -1  | 17   | 51  | 4.60 | 6         | -40 | 36  | 23  | 4.42 | 6         | -1  | 32  | 30  | 4.48 |
| 7   | 32  | -59 | -23 | 3.65 | 7   | -24 | -50  | 65  | 4.04 | 7         | -55 | -31 | 8   | 3.60 | 7         | -60 | -23 | 3   | 4.40 |
| 8   | -28 | -4  | 63  | 3.54 | 8   | -36 | -2   | 50  | 3.85 | 8         | 1   | -16 | 11  | 3.53 | 8         | -43 | 24  | 27  | 3.60 |
| 9   | -19 | -61 | 47  | 3.48 | 9   | -3  | -9   | 63  | 3.73 | 9         | -1  | -52 | -17 | 3.35 | 9         | 17  | 12  | 65  | 3.50 |
| 10  | -50 | -71 | 17  | 3.43 | 10  | 1   | -33  | -15 | 3.64 | 10        | -25 | 49  | -15 | 3.26 | 10        | -4  | -54 | -14 | 3.39 |
| 11  | -21 | -28 | 17  | 3.42 | 11  | -55 | -50  | -2  | 3.62 | 11        | 7   | -23 | -9  | 3.16 | 11        | -12 | 8   | 8   | 3.37 |
| 12  | -52 | -42 | 32  | 3.42 | 12  | -28 | -107 | 6   | 3.60 | 12        | 12  | -66 | 17  | 3.08 | 12        | -62 | 12  | -20 | 3.36 |
| 13  | -7  | 5   | 65  | 3.40 | 13  | -23 | -26  | 62  | 3.54 | 13        | -8  | -9  | -2  | 3.07 | 13        | 36  | -74 | -23 | 3.35 |
| 14  | -42 | 18  | 35  | 3.39 | 14  | 27  | -62  | -26 | 3.37 | 14        | -12 | -59 | 2   | 3.05 | 14        | -24 | 53  | 12  | 3.32 |
| 15  | 60  | 24  | -15 | 3.36 | 15  | 43  | 24   | 0   | 3.34 | 15        | 15  | -69 | -23 | 2.84 | 15        | 42  | -38 | 5   | 3.32 |
| 16  | 7   | -88 | 42  | 3.26 | 16  | 46  | -56  | -24 | 3.22 | 16        | -31 | -68 | 47  | 2.84 | 16        | 21  | 51  | 35  | 3.26 |
| 17  | -28 | 44  | 30  | 3.18 | 17  | -35 | -42  | 47  | 3.18 | 17        | -23 | -97 | -6  | 2.81 | 17        | 4   | -19 | 2   | 3.24 |
| 18  | -25 | -37 | 62  | 3.16 | 18  | 12  | -13  | -2  | 3.15 | 18        | 48  | -9  | 39  | 2.76 | 18        | -19 | 51  | 24  | 3.23 |
| 19  | -19 | -49 | 66  | 3.14 | 19  | -28 | -66  | 45  | 3.14 | 19        | -16 | -11 | 26  | 2.72 | 19        | 27  | -95 | -5  | 3.13 |
| 20  | 7   | -69 | 20  | 2.96 | 20  | -28 | 49   | 20  | 3.07 | 20        | -46 | 30  | -23 | 2.71 | 20        | 56  | -6  | 29  | 3.12 |
| 21  | 68  | 8   | -2  | 2.81 | 21  | -48 | -62  | -20 | 3.07 | 21        | 17  | 12  | 66  | 2.67 | 21        | -15 | 53  | 35  | 3.10 |
| 22  | 63  | 25  | 6   | 2.79 | 22  | -38 | -16  | 54  | 2.97 | 22        | 62  | 15  | -9  | 2.67 | 22        | -54 | 18  | -11 | 3.02 |
| 23  | 1   | -37 | -18 | 2.65 | 23  | 28  | -93  | 65  | 2.78 | 23        | -15 | 48  | 26  | 2.64 | 23        | -31 | 12  | 50  | 2.89 |
| 24  | -32 | 51  | 14  | 2.64 | 24  | -51 | -33  | 27  | 2.77 | 24        | -62 | -44 | -11 | 2.64 | 24        | -11 | -59 | 0   | 2.83 |
| 25  | -5  | -14 | 20  | 2.54 | 25  | -13 | 10   | 5   | 2.77 | 25        | 54  | -4  | 33  | 2.62 | 25        | 47  | -7  | 47  | 2.83 |
|     |     |     |     |      | 26  | 28  | -97  | 56  | 2.73 | 26        | 40  | -66 | 60  | 2.60 | 26        | -7  | -83 | 48  | 2.82 |
|     |     |     |     |      | 27  | 43  | -100 | 6   | 2.56 | 27        | -64 | 15  | 30  | 2.58 | 27        | 17  | 58  | -12 | 2.79 |
|     |     |     |     |      | 28  | -15 | 12   | 21  | 2.51 | 28        | -21 | 53  | 56  | 2.52 | 28        | 46  | 15  | 5   | 2.76 |
|     |     |     |     |      |     |     |      |     |      |           |     |     |     |      | 29        | 0   | -7  | 11  | 2.68 |
|     |     |     |     |      |     |     |      |     |      |           |     |     |     |      | 30        | 12  | -73 | 63  | 2.64 |
|     |     |     |     |      |     |     |      |     |      |           |     |     |     |      | 31        | 34  | 17  | -3  | 2.64 |
|     |     |     |     |      |     |     |      |     |      |           |     |     |     |      | 32        | -13 | 63  | -8  | 2.64 |
|     |     |     |     |      |     |     |      |     |      |           |     |     |     |      | 33        | -56 | 8   | -9  | 2.62 |
