# Supplementary material
Source: PubMed Central journal article supplement (PMC17683)
Supplement: pnas_97_25_13961__5.pdf [file pnas_97_25_13961__5.pdf]

Table 6.

View signs - Fixation

| ASL |     |     |     |      | LSQ |     |     |     |      | Hearing 1 |     |     |     |      | Hearing 2 |     |     |     |      |
|-----|-----|-----|-----|------|-----|-----|-----|-----|------|-----------|-----|-----|-----|------|-----------|-----|-----|-----|------|
| #   | x   | y   | z   | t    | #   | x   | y   | z   | t    | #         | x   | y   | z   | t    | #         | x   | y   | z   | t    |
| 1   | 16  | -92 | 9   | 7.07 | 1   | 40  | -74 | -2  | 6.78 | 1         | 40  | -74 | -2  | 6.02 | 1         | 44  | -71 | 5   | 5.31 |
| 2   | -1  | -85 | -2  | 6.44 | 2   | 0   | -90 | 5   | 6.00 | 2         | 11  | -93 | 9   | 5.83 | 2         | 4   | -93 | 9   | 5.13 |
| 3   | -48 | -74 | 5   | 5.26 | 3   | 17  | -93 | 5   | 5.94 | 3         | -36 | -78 | -6  | 5.71 | 3         | -40 | -61 | -12 | 4.19 |
| 4   | 25  | -30 | 51  | 5.12 | 4   | -40 | -47 | -17 | 5.68 | 4         | 23  | -88 | 18  | 5.04 | 4         | -11 | -85 | 8   | 4.18 |
| 5   | 46  | -37 | 8   | 4.43 | 5   | 20  | -83 | -8  | 5.24 | 5         | -4  | -90 | -9  | 4.96 | 5         | -42 | -76 | -6  | 3.85 |
| 6   | -34 | -23 | 57  | 4.35 | 6   | -46 | -71 | -2  | 5.19 | 6         | -15 | -97 | 14  | 4.49 | 6         | -43 | 12  | 42  | 3.84 |
| 7   | 29  | 32  | -17 | 3.68 | 7   | -63 | 12  | -11 | 4.78 | 7         | -21 | -92 | 5   | 4.44 | 7         | 21  | -88 | 24  | 3.73 |
| 8   | -35 | -81 | -8  | 3.42 | 8   | -47 | -59 | 8   | 4.77 | 8         | -47 | -74 | 5   | 4.15 | 8         | -24 | 24  | 56  | 3.66 |
| 9   | -24 | -92 | 9   | 3.39 | 9   | 40  | -38 | 3   | 4.31 | 9         | 50  | -59 | 6   | 3.86 | 9         | 3   | 13  | 63  | 3.61 |
| 10  | 7   | -21 | 66  | 3.13 | 10  | 38  | -47 | -17 | 4.22 | 10        | 24  | -80 | -15 | 3.73 | 10        | -50 | -66 | 21  | 3.60 |
| 11  | -50 | -16 | -6  | 3.11 | 11  | -67 | -7  | 0   | 3.89 | 11        | -20 | -4  | -23 | 3.71 | 11        | -25 | 3   | -18 | 3.54 |
| 12  | 40  | -62 | -17 | 2.95 | 12  | 1   | -37 | 30  | 3.73 | 12        | 8   | -80 | -18 | 3.66 | 12        | 31  | -19 | 56  | 3.49 |
| 13  | 16  | -4  | 57  | 2.77 | 13  | -16 | -85 | -2  | 3.64 | 13        | 23  | -25 | 35  | 3.12 | 13        | -13 | 34  | 56  | 3.41 |
| 14  | 12  | 15  | 29  | 2.58 | 14  | -24 | -38 | 57  | 3.62 | 14        | -20 | 34  | 5   | 3.05 | 14        | -12 | 37  | 56  | 3.41 |
| 15  | -11 | -1  | 56  | 2.58 | 15  | 58  | 32  | 20  | 3.51 | 15        | -43 | -33 | -20 | 2.97 | 15        | -48 | 46  | -3  | 3.37 |
| 16  | -42 | 3   | 48  | 2.58 | 16  | -54 | 25  | -21 | 3.51 | 16        | 20  | 18  | 23  | 2.92 | 16        | 11  | 44  | 47  | 3.35 |
| 17  | 31  | -14 | 57  | 2.52 | 17  | 54  | -42 | 9   | 3.27 | 17        | 17  | 24  | 11  | 2.87 | 17        | -52 | 22  | 26  | 3.33 |
| 18  | -55 | -28 | 8   | 2.52 | 18  | -9  | 70  | 11  | 3.17 | 18        | -58 | 6   | -12 | 2.85 | 18        | 4   | -31 | 26  | 3.27 |
|     |     |     |     |      | 19  | -7  | -50 | 11  | 3.10 | 19        | -12 | -57 | -21 | 2.85 | 19        | -38 | 27  | -21 | 3.04 |
|     |     |     |     |      | 20  | 21  | -73 | 45  | 3.06 | 20        | -25 | -31 | 44  | 2.83 | 20        | -35 | -50 | 54  | 2.97 |
|     |     |     |     |      | 21  | 17  | -95 | 54  | 3.04 | 21        | -38 | -49 | -15 | 2.83 | 21        | 0   | 56  | 35  | 2.73 |
|     |     |     |     |      | 22  | -28 | -11 | 42  | 2.84 | 22        | -31 | -54 | 11  | 2.81 | 22        | 19  | 30  | 54  | 2.72 |
|     |     |     |     |      | 23  | -12 | 53  | 48  | 2.79 | 23        | -35 | -62 | 59  | 2.74 | 23        | -39 | -40 | -15 | 2.69 |
|     |     |     |     |      | 24  | 1   | 70  | 50  | 2.72 | 24        | 1   | 3   | -5  | 2.74 |           |     |     |     |      |
|     |     |     |     |      | 25  | 0   | -42 | -5  | 2.69 | 25        | -31 | -49 | 62  | 2.69 |           |     |     |     |      |
|     |     |     |     |      | 26  | 59  | 6   | -15 | 2.67 | 26        | -60 | 30  | -15 | 2.69 |           |     |     |     |      |
|     |     |     |     |      | 27  | 7   | -44 | 68  | 2.67 | 27        | -28 | -25 | 2   | 2.62 |           |     |     |     |      |
|     |     |     |     |      | 28  | -17 | -28 | -24 | 2.66 | 28        | -7  | 12  | 66  | 2.58 |           |     |     |     |      |
|     |     |     |     |      | 29  | -58 | -33 | 6   | 2.63 | 29        | -56 | -9  | 23  | 2.57 |           |     |     |     |      |
|     |     |     |     |      | 30  | -62 | -44 | -11 | 2.57 | 30        | -1  | -35 | -2  | 2.54 |           |     |     |     |      |
|     |     |     |     |      |     |     |     |     |      | 31        | -39 | 6   | -21 | 2.53 |           |     |     |     |      |
|     |     |     |     |      |     |     |     |     |      | 32        | 34  | -35 | 23  | 2.51 |           |     |     |     |      |
